# Supplementary figures and images for: Explaining urokinase type plasminogen activator inhibition by amino-5-hydroxybenzimidazole and two naphthamidine-based compounds through quantum biochemistry
Source: Royal Society of Chemistry journal article supplement (doi:10.1039/c8cp04315a), 2018-01-01

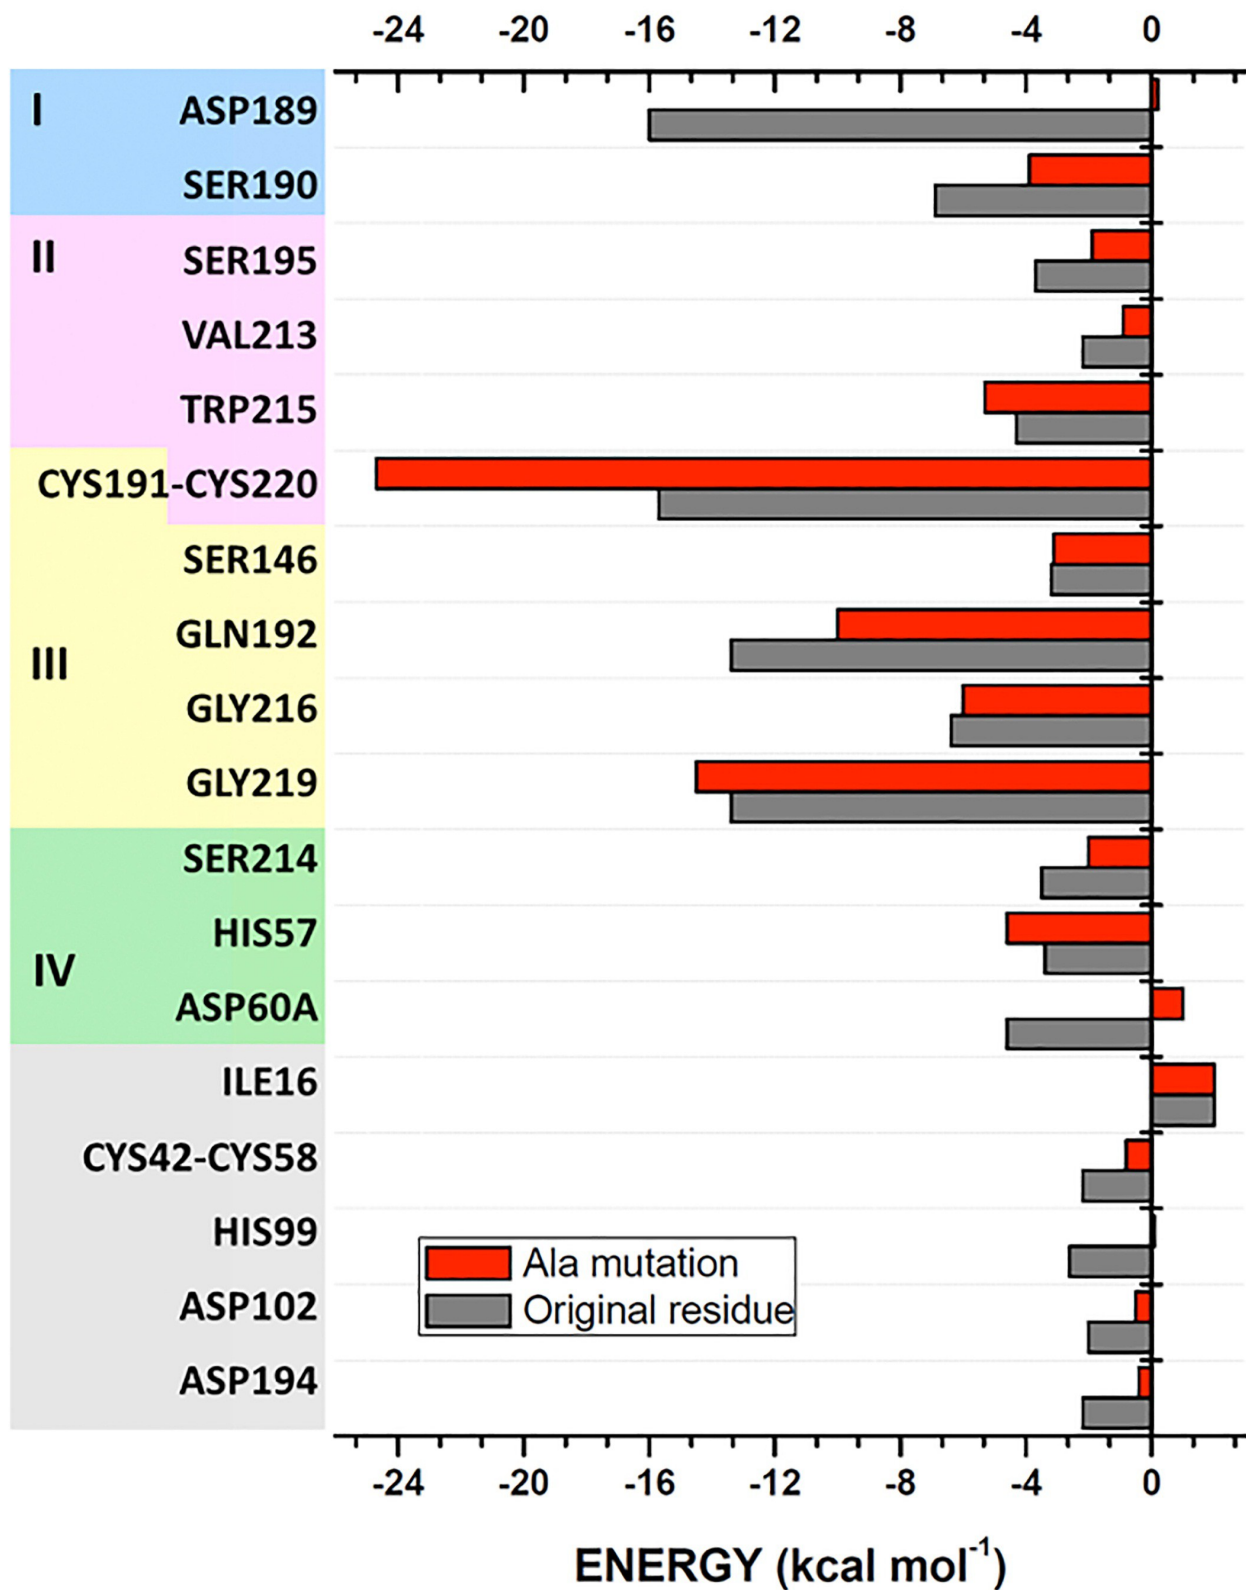

Supplement: c8cp04315a1.pdf [file c8cp04315a1.pdf]

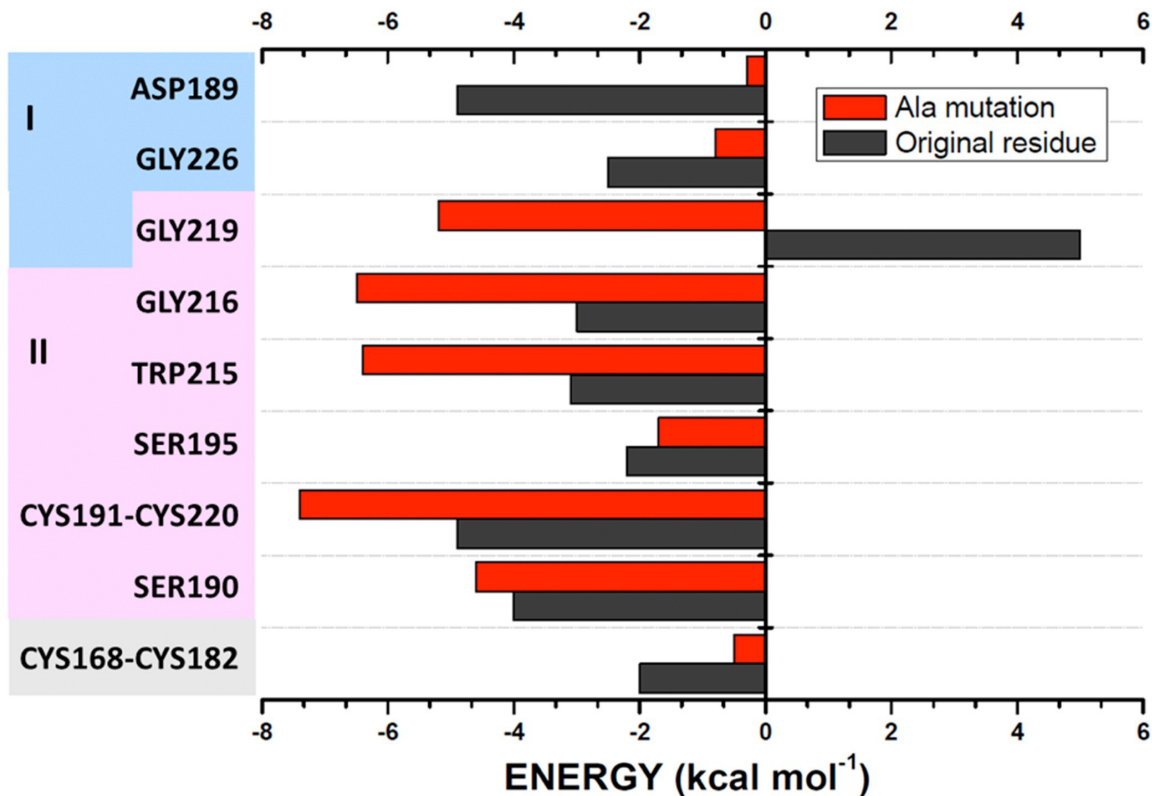

Supplement: c8cp04315a3.pdf [file c8cp04315a3.pdf]
